# Supplementary material for: Modulating ATP binding cassette transporters in papillary renal cell carcinoma type 2 enhances its response to targeted molecular therapy
Source: PubMed Central journal article supplement (PMC6165997; doi:10.1002/1878-0261.12346), 2018-08-23
Supplement: MOL2-12-1673-s001.pdf [file MOL2-12-1673-s001.pdf]

## Supplementary Figure 1:

A.

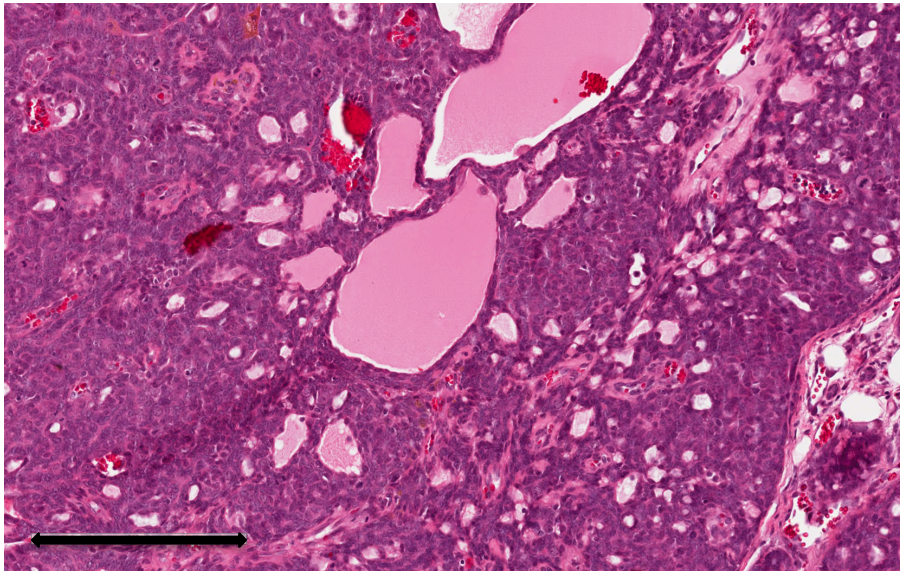

B.

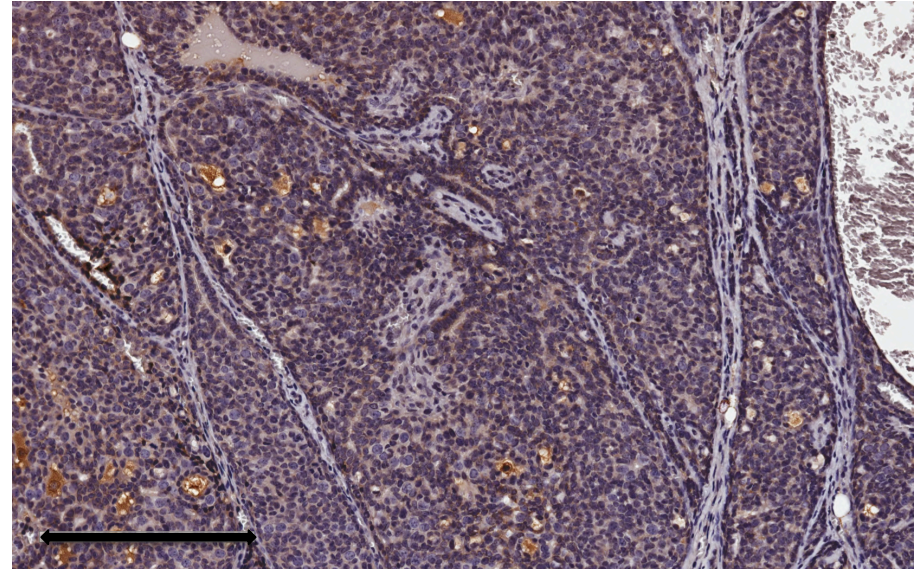

Supplementary Figure 1. The CAL-54 RCC cell line represents PRCC1. A) Histologic examination of sections of these cells xenografted in mice shows tubulo-papillary with small cells, scant cytoplasm and inconspicuous nucleoli consistent with PRCC1 morphology, B). The cells stained negative for ABCC2 IHC also consistent with PRCC1 tumors. Scale bar = 200  $\mu$ m

## Supplemental Figure 2:

### Correlation of top matched genes

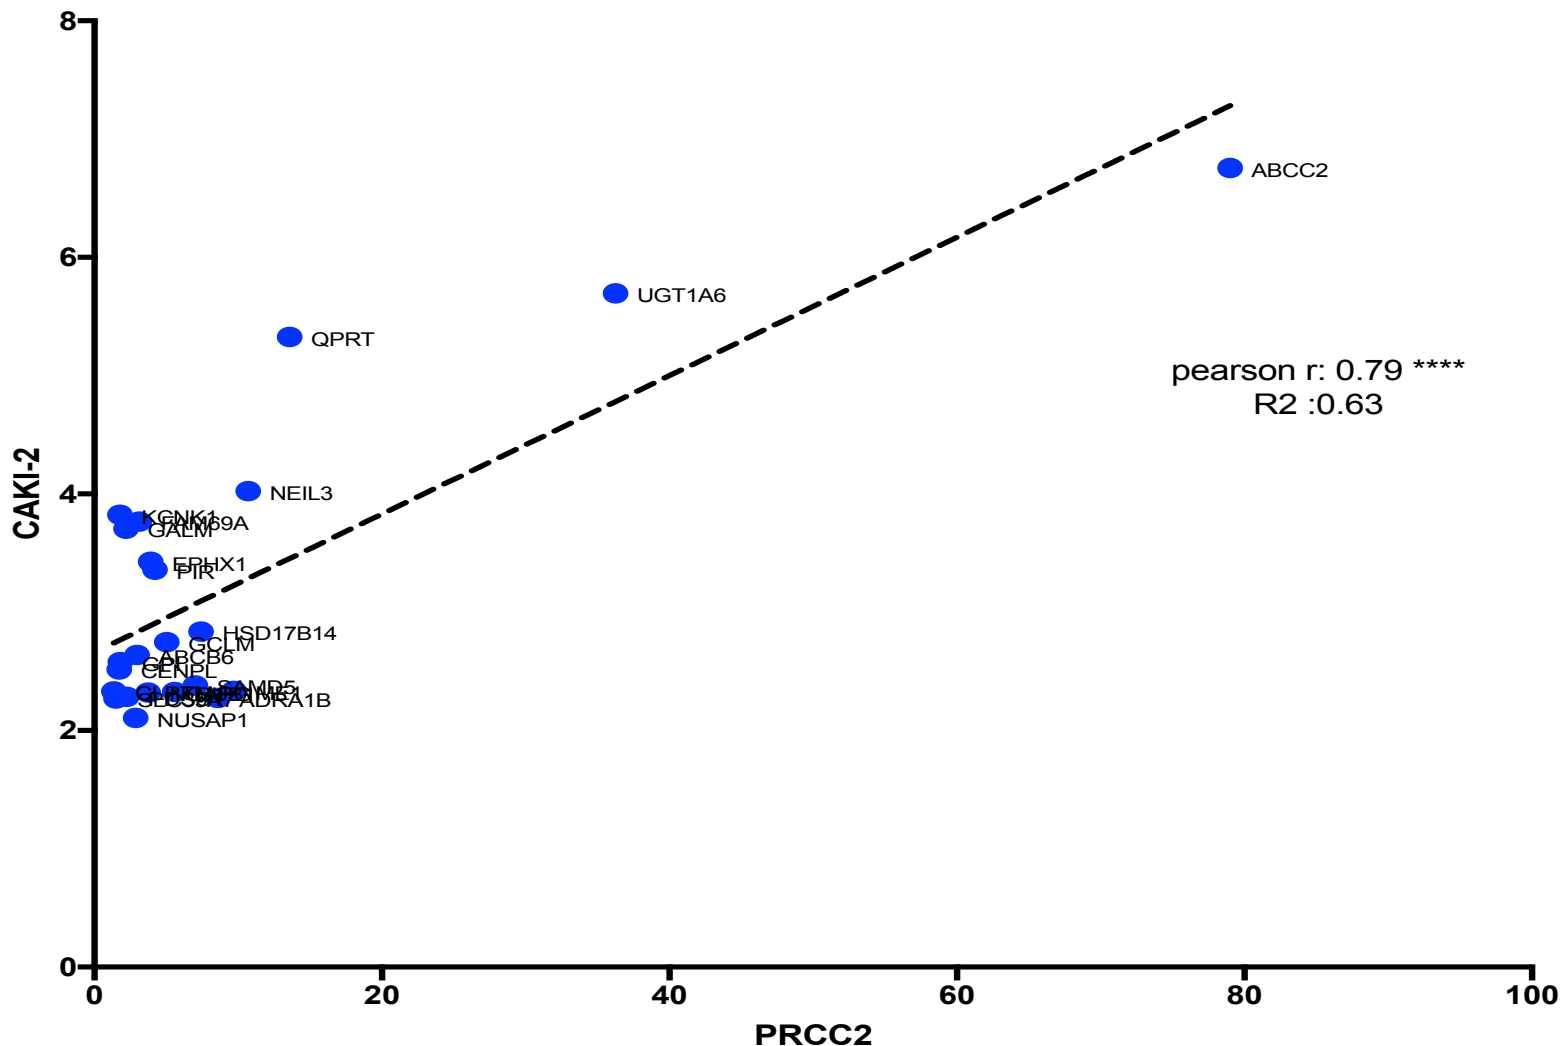

Supplementary Figure 2. The CAKI-2 cell line represents PRCC2. CAKI-2 shows highly significant positive correlation with PRCC2 on top differentially expressed genes.

**Supplementary Table 1:** Histological examination of mice tumor models

| Treatment groups  | Histological pattern   | Average Necrosis | Local invasion       | Metastasis (Lung) | Lung                                     | Kidney                      | Liver |
|-------------------|------------------------|------------------|----------------------|-------------------|------------------------------------------|-----------------------------|-------|
| Untreated         | Papillary architecture | 2-5%             | All locally invasive | 25-30%            | Mild to moderate inflammation            | No Inflammation or necrosis |       |
| MK571             |                        | 2-5%             |                      | 75%               |                                          |                             |       |
| Sunitinib         |                        | 14%              |                      | 50%               |                                          |                             |       |
| Everolimus        |                        | 7.5%             | 75% locally invasive | 25-30%            | Severe acute inflammation in 50% of mice |                             |       |
| Sunitinib + MK571 |                        | 20%              | 63% locally invasive | 25-30%            | Mild to moderate inflammation            |                             |       |
